# Supplementary material
Source: Springer Nature journal article supplement (https://www.springermedizin.de/resource/supplementary/13229_2014_143_MOESM6_ESM.pdf/9676258)
Supplement: MOESM6 [file 9676258]

A

AS del 1-0      Nml 1-0      mat. int dup(15)-12  
 mat. int dup(15)-02      pat. int dup(15)-04      Idic1-8  
 IdicCB-07/-09

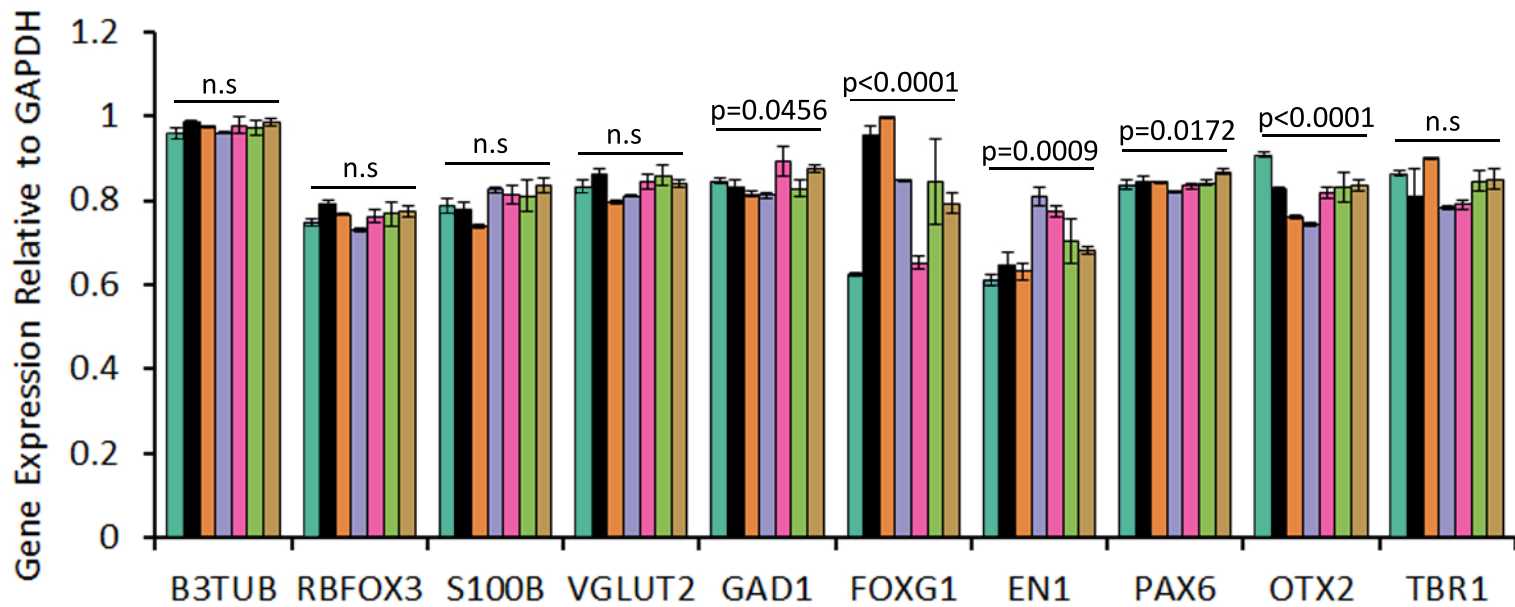

B

### P<0.05 by Tukey's Multiple Comparison Test

#### GAD1

No pairwise comparisons had P<0.05

#### FOXG1

mat. int dup(15)-12 vs AS del 1-0  
 mat. int dup(15)-12 vs pat. int dup(15)-04  
 mat. int dup(15)-12 vs IdicCB-07/09  
 mat. int dup(15)-02 vs AS del 1-0  
 Idic1-8 vs AS del 1-0  
 AS del 1-0 vs Nml 1-0  
 pat. int dup(15)-04 vs Nml 1-0

#### EN1

mat. int dup(15)-12 vs mat. int dup(15)-02  
 mat. int dup(15)-12 vs pat. int dup(15)-04  
 mat. int dup(15)-02 vs AS del 1-0  
 mat. int dup(15)-02 vs Nml 1-0  
 AS del 1-0 vs pat. int dup(15)-04

#### PAX6

mat. int dup(15)-02 vs IdicCB-07/09

#### OTX2

mat. int dup(15)-12 vs AS del 1-0  
 mat. int dup(15)-12 vs IdicCB-07/09  
 mat. int dup(15)-02 vs Idic1-8  
 mat. int dup(15)-02 vs AS del 1-0  
 mat. int dup(15)-02 vs Nml 1-0  
 mat. int dup(15)-02 vs IdicCB-07/09  
 Idic1-8 vs AS del 1-0  
 AS del 1-0 vs pat. int dup(15)-04  
 AS del 1-0 vs Nml 1-0
